# Supplementary material
Source: ML conference proceedings conference paper supplement (https://proceedings.neurips.cc/paper_files/paper/2023/hash/5a1667459d0cdeb2fe6b2f0dffc5cb9d-Abstract.html)
Supplement: Supplementary file 1 [file 5a1667459d0cdeb2fe6b2f0dffc5cb9d-Supplemental-Conference.zip]

Archive with 2 entries (2 files):
- code.zip
- supp_understanding_bisimulation_neurips2023.pdf
